# 1 **Opportunistic screening for coronary artery calcium deposition using chest** 2 **radiographs – a multi-objective models with multi-modal data fusion**

3  
4 Jiwoong Jeong<sup>1</sup>; Chao, Chieh-Ju, M.D.<sup>2</sup>; Arsanjani, Reza, M.D.<sup>3</sup>; Ayoub, Chadi, M.B.B.S., Ph.D.<sup>3</sup>;  
5 Steven J. Lester, MD<sup>3</sup>; Milagros Pereyra, M.D.<sup>3</sup>; Said, Ebram F, M.D.<sup>3</sup>; Michael Roarke, B.S.<sup>3</sup>; Tagle-  
6 Cornell, Cecilia, APRN, C.N.P., M.S.<sup>3</sup>; Koepke, Laura M., APRN, AGACNP-BC, M.S.N.<sup>3</sup>; Yi-Lin Tsai,  
7 M.D.<sup>5</sup>; Jung-Hsuan, Chen, M.D.<sup>6</sup>; Chun-Chin Chang, M.D.<sup>5</sup>; Farina, Juan M., M.D.<sup>3</sup>; Hari Trivedi, MD<sup>7</sup>;  
8 Bhavik N. Patel, MD, MBA<sup>4</sup>; Imon Banerjee, PhD<sup>1</sup>

9  
10 <sup>1</sup>School of Computing and Augmented Intelligence, Arizona State University, 699 S Mill Ave, Tempe,  
11 AZ 85281

12 <sup>2</sup>Department of Cardiology, Mayo Clinic, 200 1st Street Southwest, Rochester, MN 55902

13 <sup>3</sup>Department of Cardiology, Mayo Clinic, 13400 E. Shea Blvd. Scottsdale, AZ 85259

14 <sup>4</sup>Department of Radiology, Mayo Clinic, 13400 E. Shea Blvd. Scottsdale, AZ 85259

15 <sup>5</sup>Department of Internal Medicine, Taipei Veterans General Hospital, Taiwan

16 <sup>6</sup>Department of Radiology, Taipei Veterans General Hospital, Taiwan

17 <sup>7</sup>Department of Radiology and Imaging Sciences, Emory University, 100 Woodruff Circle  
18 Atlanta, GA 30322 USA

19  
20 \*Corresponding Author

21 699 S Mill Ave,

22 Tempe, AZ 85281

23 Email: [jjeong35@asu.edu](mailto:jjeong35@asu.edu)

## 24 **Abstract:**

25  
26 **Background:** To create an opportunistic screening strategy by multitask deep learning methods to stratify  
27 prediction for coronary artery calcium (CAC) and associated cardiovascular risk with frontal chest x-rays  
28 (CXR) and minimal data from electronic health records (EHR).

29 **Methods:** In this retrospective study, 2,121 patients with available computed tomography (CT) scans and  
30 corresponding CXR images were collected internally (Mayo Enterprise) with calculated CAC scores  
31 binned into 3 categories (0, 1-99, and 100+) as ground truths for model training. Results from the internal  
32 training were tested on multiple external datasets (domestic (EUH) and foreign (VGHTPE)) with  
33 significant racial and ethnic differences and classification performance was compared.

34 **Findings:** Classification performance between 0, 1-99, and 100+ CAC scores performed moderately on  
35 both the internal test and external datasets, reaching average f1-score of 0.66 for Mayo, 0.62 for EUH and  
36 0.61 for VGHTPE. For the clinically relevant binary task of 0 vs 400+ CAC classification, the  
37 performance of our model on the internal test and external datasets reached an average AUCROC of 0.84.

38 **Interpretation:** The fusion model trained on CXR performed better (0.84 average AUROC on internal  
39 and external dataset) than existing state-of-the-art models on predicting CAC scores only on internal (0.73  
40 AUROC), with robust performance on external datasets. Thus, our proposed model may be used as a  
41 robust, first-pass opportunistic screening method for cardiovascular risk from regular chest radiographs.  
42 For community use, trained model and the inference code can be downloaded with an academic open-  
43 source license from [https://github.com/jeong-jasonji/MTL\\_CAC\\_classification](https://github.com/jeong-jasonji/MTL_CAC_classification).

44 **Funding:** The study was partially supported by National Institute of Health 1R01HL155410-01A1 award.

## 47 **Introduction**

48  
49 Coronary artery disease (CAD) remains a significant global health concern, contributing to substantial  
50 morbidity and mortality rates (1). As such, effective risk assessment and early intervention strategies are  
51 essential for reducing the burden of coronary artery calcification (CAC) (2). Computational tomography  
52 (CT) imaging has revolutionized the field through the use of CAC score (3). CAC score has been proven  
53 to be valuable for accurate risk stratification and guiding preventive interventions, such as statin therapy  
54 and aspirin administration, especially in asymptomatic individuals (4).

55  
56 Despite the advantages of CT imaging in assessing CAC scores, certain inherent drawbacks limit its  
57 widespread application. Factors such as electrocardiogram (ECG)-gating requirements and the presence  
58 of arrhythmias pose challenges to obtaining reliable and accurate measurements until the development  
59 of qualitative ungated CAC score estimation (5). Moreover, conducting these CT exams often require  
60 significant technical, equipment, and clinical resources, which may not be operationally feasible at small  
61 healthcare facilities. While the practice is moving toward using non-gated CT scanning, a high-quality  
62 CAC study still requires multi-slice CT scanners and additional image processing and analysis by trained  
63 specialists for the quantification and interpretation of CAC score (6). Furthermore, CAC testing is not  
64 universally covered by insurance plans (7). While there is some evidence that CAC might be cost  
65 effective in patients with a family history of coronary disease (8), generally the measurement of CAC  
66 testing is not cost-effective for screening large populations to detect CAD in asymptomatic individuals.

67  
68 In light of these limitations, there is growing clinical interest in exploring alternative methods that can  
69 simplify the assessment of CAC scores or detection of the potential plaque deposition on routine imaging  
70 modalities using opportunistic screening (9). One potential solution lies in the combination of regular  
71 chest radiographs/X-rays (CXR) and artificial intelligence (AI) technology. While CXR is not  
72 conventionally considered the primary modality for directly assessing coronary artery conditions, recent  
73 advancements in deep learning techniques have opened new possibilities. By leveraging AI algorithms, it  
74 becomes feasible to extract the calcification features present in CXR images, allowing for the  
75 opportunistic estimation of CAC scores. Compared to CT imaging, a CXR-based AI approach could offer  
76 several distinct advantages. Firstly, it significantly decreased ionizing radiation exposure (0.1 mSv versus  
77 0.8-10.5 mSv), therefore reducing the associated health risks (10,11). This attribute is particularly crucial  
78 for repeated or serial screenings, enabling longitudinal monitoring of CAC scores without increasing  
79 patients' radiation exposure, roughly nine CXR doses equaling one CT dose (12). Additionally, CXR is a  
80 widely available and cost-effective imaging modality, making it nearly universally accessible across  
81 various healthcare settings (13).

82  
83 This study aims to investigate the potential of utilizing CXR and AI technologies to identify and stratify  
84 patients with coronary atherosclerosis, offering a low-radiation and cost-effective alternative for risk  
85 assessment. We hypothesize that by applying deep learning algorithms to CXR images, it is possible to  
86 extract the necessary calcification features and accurately identify high CAC category which can provide  
87 an efficient way of detecting asymptomatic individuals. Through this approach, we anticipate providing  
88 clinicians with a simpler and more accessible tool for risk stratification, ultimately facilitating timely  
89 interventions and improving patient outcomes related to CAD with cost-efficient imaging modality.

## 90 **Materials and Methods**

### 91 Internal cohort

92  
93 We collected a retrospective internal cohort of 2,121 patients who had a coronary CT scan between 2012 -  
94 2022 and corresponding CXR imaging exam with frontal view within a  $\pm 1$  year period of the CT exam  
95 day at the Mayo Clinic. If a patient underwent multiple radiography or CT examinations, all were  
96 included in the data set, with radiographs linked to the temporally closest calcium scoring CT (Table 1).  
97

98 Informed consent waiver and ethical approval was obtained from the Mayo Clinic Institutional Review  
 99 Board (IRB protocol#22-006839). The 2/3 of the internal dataset was used for training and the 1/3 was  
 100 split into validation and testing resulting in 1,424/356/341 patients, respectively. CAC scoring was  
 101 performed on cardiac chest CT according to standard imaging acquisition and Agatston scoring methods  
 102 (14). We extracted the CAC score from clinical radiology reports using simple regular expression  
 103 (REGEX) and manually reviewed the extracted scores. After extraction, CAC scores were grouped into  
 104 three bins based on accepted clinical cutoffs and literature defining prognosis by CAC category (15,16):  
 105 ‘no CAC’ - 0, 1-99, and 100+. Additionally, patients with CAC 400+ were also identified to test the  
 106 models’ performance in differentiating high vs. low-risk cases and compare to available literature (9).  
 107

108 **Table 1.** Demonstrate the patient characteristics for internal and two external institutions (domestic and  
 109 foreign). MACE outcomes were not available on the external dataset.

| Characteristics                         | Subtype                     | Mayo Clinic Enterprise<br>(n=2,306) | EUH<br>(n=386) | VGHTPE<br>(n=499) |
|-----------------------------------------|-----------------------------|-------------------------------------|----------------|-------------------|
| Age                                     |                             | 58.38±9.65                          | 60.48±9.95     | 59.28±11.68       |
| Gender                                  | Male                        | 1416 (61%)                          | 231 (60%)      | 313 (63%)         |
|                                         | Female                      | 890 (39%)                           | 155 (40%)      | 186 (37%)         |
| CAC distribution                        | 0                           | 1060 (46%)                          | 137 (35%)      | 209 (42%)         |
|                                         | 1-99                        | 661 (29%)                           | 104 (27%)      | 150 (30%)         |
|                                         | 100+                        | 585 (25%)                           | 145 (38%)      | 140 (28%)         |
| Race                                    | White                       | 1714 (74%)                          | 188 (49%)      | 0 (0%)            |
|                                         | Black or African American   | 56 (2%)                             | 33 (9%)        | 0 (0%)            |
|                                         | Native American             | 6 (0%)                              | 0 (0%)         | 0 (0%)            |
|                                         | Asian                       | 61 (3%)                             | 6 (2%)         | 499 (100%)        |
|                                         | Other/unknown               | 469 (20%)                           | 159 (41%)      | 0 (0%)            |
| Ethnicity                               | Hispanic or Latino          | 92 (4%)                             | 4 (1%)         | 0 (0%)            |
|                                         | Not Hispanic or Latino      | 1697 (74%)                          | 276 (72%)      | 499 (100%)        |
|                                         | Unknown                     | 517 (22%)                           | 105 (27%)      | 0 (0%)            |
| CCI Comorbidities<br>(at time of x-ray) | Cerebrovascular Disease     | 27 (1%)                             | 4 (11%)        | 0 (0%)            |
|                                         | Congestive Heart Failure    | 5 (0%)                              | 2 (6%)         | 0 (0%)            |
|                                         | Myocardial Infarction       | 0 (0%)                              | 0 (0%)         | 0 (0%)            |
|                                         | Peripheral Vascular Disease | 39 (2%)                             | 1 (3%)         | 0 (0%)            |
|                                         | Renal Disease               | 7 (0%)                              | 0 (0%)         | 0 (0%)            |

|      |            |     |     |
|------|------------|-----|-----|
| MACE | 253 (8.5%) | N/A | N/A |
|------|------------|-----|-----|

110  
111 External cohort  
112 To test the model's robustness and generalization capabilities, we collected testing data from two external  
113 healthcare centers (*domestic and foreign*) - Emory University Healthcare (EUH), and Taipei Veterans  
114 General Hospital (VGHTPE approved by IRB: 2023-09-009CC) in Taipei, Taiwan, with significantly  
115 varying patient populations in terms of race and ethnicity. To match the internal data, we applied the same  
116 patient selection criteria - patients who had a coronary CT scan between 2012 - 2022 and a CXR exam  
117 with frontal view within a  $\pm 1$  year period of the CT (Table 1). CAC scoring was performed using  
118 Agatston scoring methods (14). Only a limited number of randomly selected cases were used as testing  
119 due to legal regulation and the time-consuming de-identification process.

120  
121 Multi-channel image formation  
122 All the images were converted from Digital Imaging and Communications in Medicine (DICOM) file  
123 format to JPEG images using the open-source Niffler (<https://github.com/Emory-HITI/Niffler>) library  
124 (17). During conversion, images were kept in the original, native high-resolution image and kept in 16-bit  
125 gray-scale. During initial experiments, the CNN-based imaging models were noted to focus on the  
126 shoulder and neck regions for potentially determining the bone density and age to predict CAC scores. To  
127 reduce the learning of spurious correlation and allow the image model to focus on the coronary arteries,  
128 we first used a pre-trained lung segmentation model (18) to segment the lungs and computed a tight  
129 bounding box for cropping the center chest area. Then, we inverted the lung mask to obtain a rough  
130 segmentation of the heart and generate a lung masked image. An off-the-shelf bone suppression code (18)  
131 was used to suppress the ribs in the chest x-ray images to hide the bone density (19). Finally, we  
132 combined the original cropped chest centered image, lung masked image and rib bone suppressed image  
133 to generate a three-channel image from each frontal CXR image (see Fig 1).  
134

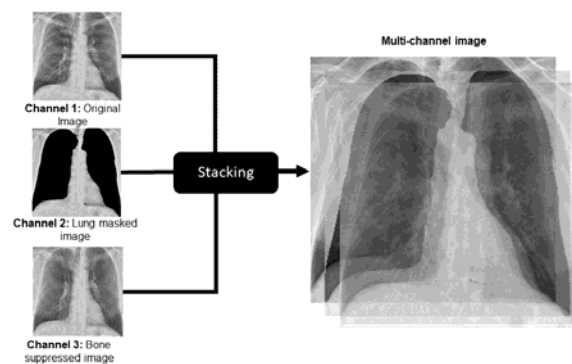

135  
136 **Figure 1.** Multi-channel image formation – formed by stacking the original cropped chest centered  
137 image, lung masked image, and rib bone suppressed image.

138 Multitask Image Classification Model  
139

140 Given the complexity of the CAC detection task, we designed a multitask learning (MTL) paradigm by  
141 combining the MACE (major adverse cardiovascular event) prediction task (20) which includes acute  
142 myocardial infarction, stroke, hospitalization due to cardiac event, and cardiovascular mortality and is  
143 ideally related with the CAC detection. This parallel task can help extract additional information to  
144 support the primary CAC prediction. Based on chart-review, we manually curated MACE events within 2  
145 years of the CXR study. We design the MTL paradigm with joint learning where both tasks are optimized  
146 with weighted loss:  $l_{total} = \gamma_1 l_{MACE} + \gamma_2 l_{CAC}$ , where  $\gamma$  is the weighting parameter and  $l_{MACE}$ ,  $l_{CAC}$   
147 are the individual branch losses (Fig 2). We trained a ResNeXt101 (21) backbone with the MTL strategy

148 that uses shared CNN for both tasks and the backbone will be updated with the loss from both tasks. This  
149 strategy would have a synergistic effect on the backbone training (22).

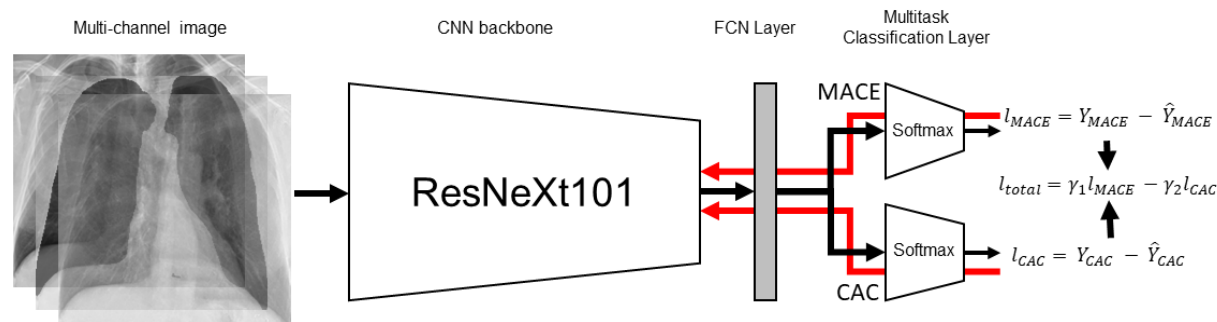

150  
151 **Figure 2.** Multitask model. A ResNeXt101 backbone was used to classify MACE event and CAC category  
152 in parallel with weighted loss.

153  
154 Fusion Model

156 To provide additional data about patient and acquisition protocol which is easy to obtain during the CXR  
157 imaging, we combined simple tabular data - patient demographics (age, gender) and X-ray manufacturer  
158 category with the CXR image using late fusion strategy (decision level fusion) (23). Addition of patient  
159 demographics and device information may also help to reduce the bias in the model and allow  
160 generalization. We trained an individual supervised model (random forest) for the tabular data and a meta  
161 learner model that takes input CAC task prediction probability from both the MTL image model and  
162 tabular model and creates an aggregated function of the probabilities. With optimal learnt weight by the  
163 meta-learner, theoretically, better or equal performance can be achieved compared to either of the  
164 individual modality models.

165  
166 **Results**

168 We evaluated the MTL CAC fusion model on a hold-out test dataset from Mayo clinic (n=341) and  
169 independent dataset from EUH (n=386) and VGHTPE (n=499) using standard statistical metrics -  
170 precision, recall, and f1-score (Table 1). The optimal operating point was selected from the receiver  
171 operating characteristic curve (ROC) and in Fig. 3, we reported the class-wise area under the ROC  
172 (AUROC) using a one-vs-all strategy to assess the model's probabilistic diagnostic accuracy. On the  
173 internal testset, the model achieved 0.72 and 0.66 AUROC for the  $\geq 100$  CAC category (clinically  
174 significant CAC) and 0 CAC category respectively. The performance was suboptimal for the intermediate  
175 0-99 CAC category (0.58 AUROC), with similar trend observed for the EUH and VGHTPE external  
176 datasets. For the overall three class CAC detection, the performance remained moderate with average f1-  
177 score - 0.66 for Mayo, 0.62 for EUH and 0.61 for VGHTPE cohorts. Despite a wide racial and ethnic  
178 difference between the centers, the performance remained consistent across the external setting.

179

**Internal test set - Mayo**

**External - EUH**

**External - VGHTPE**

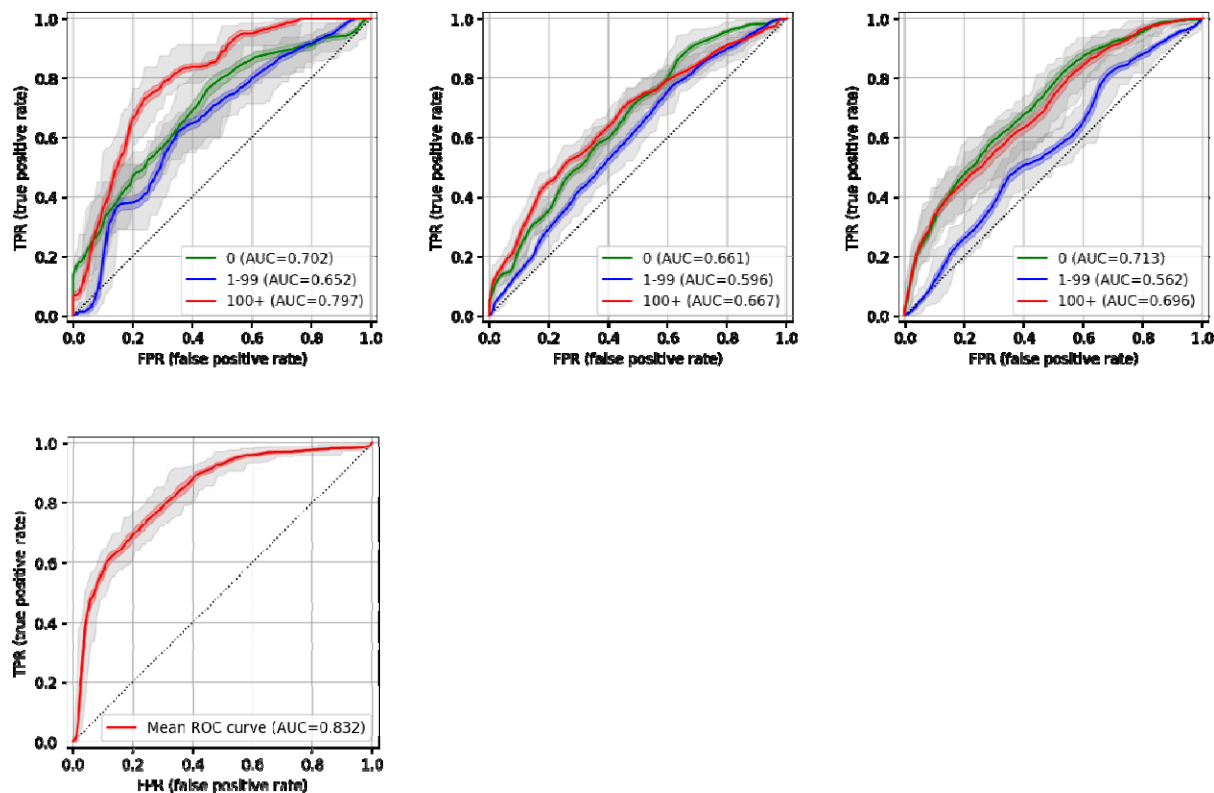

180 *Figure 3. Top row: MTL fusion model Receiver Operating Characteristic (ROC) curve for discrimination*  
 181 *of CAC category on the Mayo Internal hold-out testset, external EUH, and external VGHTPE. Shaded*  
 182 *regions display 95% confidence interval; bottom row: MTL fusion model Receiver Operating*  
 183 *Characteristic (ROC) curve for discrimination of MACE on the Mayo Internal hold-out testset.*

184  
 185 MACE prediction was performed as a *parallel auxiliary task within the MTL paradigm* and only  
 186 evaluated on the Mayo holdout test set since the MACE outcome was not available on the external EUH  
 187 and VGHTPE datasets (Fig. 3). The model achieved 0.83 AUROC score, and  $0.954 \pm 0.023$  precision and  
 188  $0.828 \pm 0.019$  recall for identifying the MACE category.

189  
 190 **Discrimination of ‘high’ and ‘low’ CAC group:** Although detection of 100+ CAC score from cardiac CT  
 191 is important for clinical intervention with a statin, opportunistic screening for the detection of higher risk  
 192 CAC from regular low cost CXR imaging is also clinically useful to triage patients to further dedicated  
 193 diagnostic evaluation. Thus, we evaluate the MTL fusion model performance for binary classification  
 194 tasks to differentiate high CAC candidates (Fig 4) and we experimented with both ‘0 vs 100+’ and ‘0 vs  
 195 400+’. The model demonstrated high performance (0.84 average AUROC) for differentiating high from  
 196 low plaque deposits using only CXR imaging and achieved fair performance (0.75 average AUROC) for  
 197 moderate plaque on both internal and external datasets. This suggests this MTL fusion model may  
 198 identify the 400+ category with 84% confidence from the regular CXR imaging.

199

**Internal Mayo test**

**EUH**

**VGHTPE**

**0 vs 100+ classification**

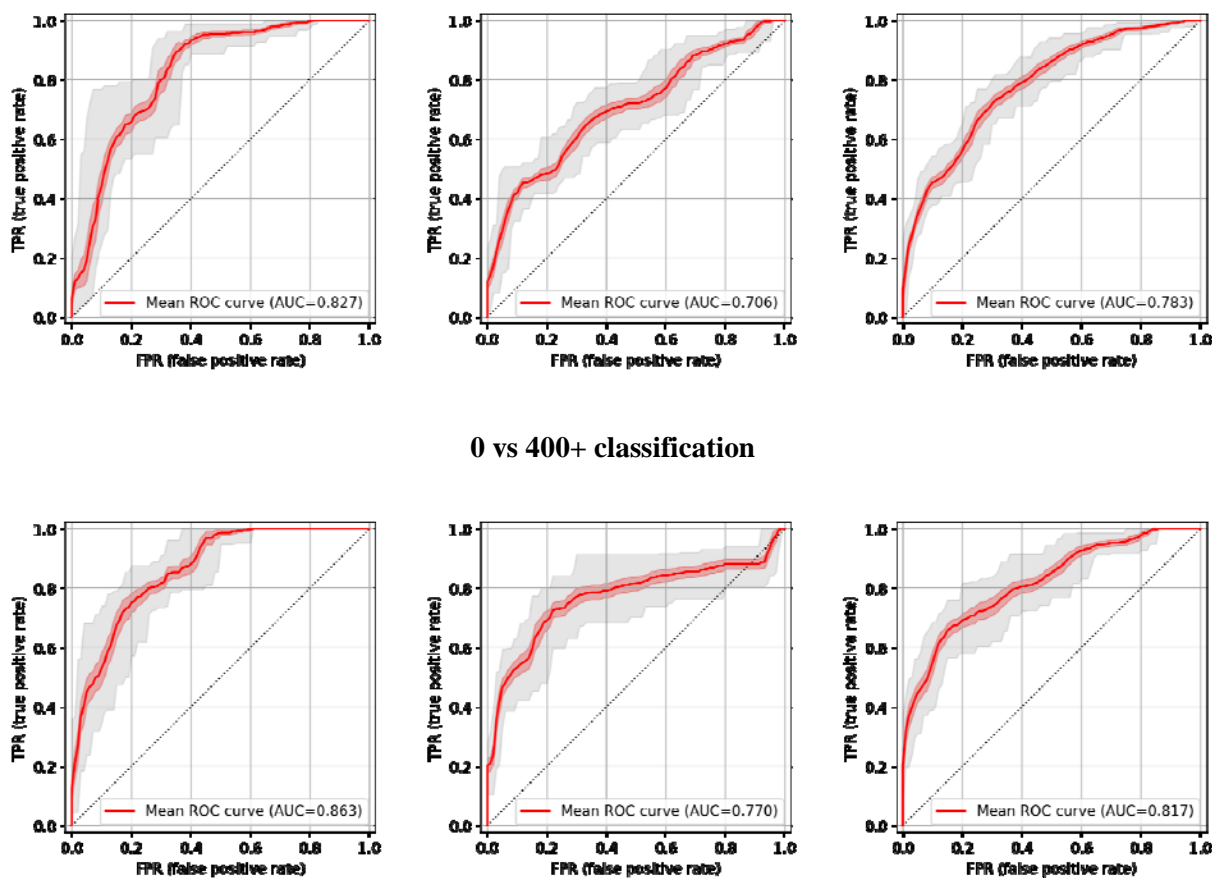

200 *Figure 4. MTL fusion model Receiver Operating Characteristic (ROC) curve for discrimination of ‘high’*  
201 *and ‘low’ CAC group on the Mayo Internal hold-out testset and EUH and VGHTPE external datasets.*  
202 *Shaded regions display 95% confidence interval;*  
203

204 **Qualitative interpretation:**

205 To better understand the potential limitations of our model and to improve its interpretability, a visual  
206 analysis of the features extracted from CXR in misclassified cases was performed using GRADCAM++  
207 (24) (red- more important, blue - less important). We found that common scenarios in misclassified cases  
208 were the presence of cardiac devices, pleuropulmonary diseases (including pulmonary nodules and  
209 pleural diseases), and aortopathy (including tortuosity and calcification of thoracic aorta) (see Figure 6).  
210 In several false positive cases (meaning cases classified as CAC score >0 by the model when true CAC  
211 score was 0) the presence of pulmonary nodules and external devices were evident in the CXR and  
212 seemed to capture the model’s attention. In panel A nodular opacities are evident in the CXR and seemed  
213 to be captured by the model mainly in the right lung; external electrodes and cables are also present in this  
214 case. In the CXR depicted in panel B, numerous pulmonary nodules and tortuosity in the descending aorta  
215 seem to be captured by the model. Panel C provides additional evidence regarding how the model can  
216 recognize and capture external devices such as electrodes and cables. For several false negative cases  
217 (meaning cases misclassified 0 by the model when true CAC score was 100+), pleuropulmonary diseases  
218 were evident. In panel E, and in panel D to a lesser extent, the model seems to focus on the prominent  
219 pulmonary vasculature of these cases. Additionally, in panel E mild calcification of thoracic aorta can be  
220 noticed. From a clinical perspective, it was difficult to identify definitive causes or imaging findings  
221 that could generate misclassifications by the model. However, after performing this qualitative  
222 interpretation, we could suggest that the model should be used with more caution in patients with

223 pleuropulmonary diseases, external devices and aortopathy. Further investigation in the explainable  
224 artificial intelligence field will be critical to confirm our findings and to secure that models involving  
225 cardiac imaging are more understandable to future users.  
226

### False positive case samples

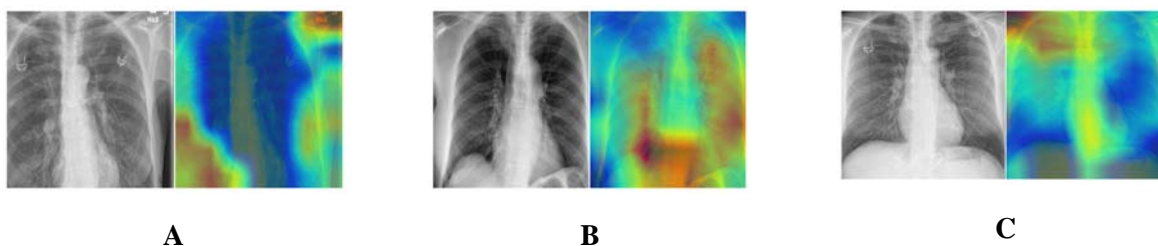

### False negative case samples (True: 100+, predicted as 1-99)

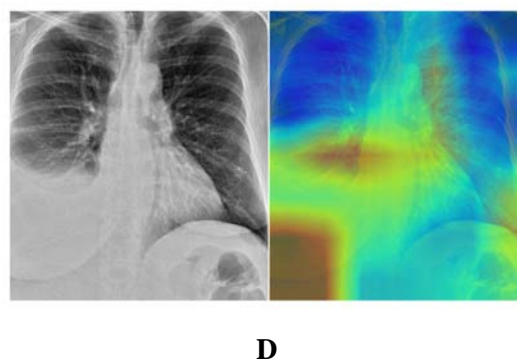

### False negative case samples (True: 100+, predicted as 0)

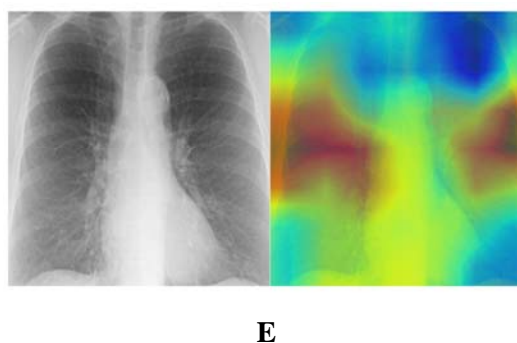

227 *Fig.6 Model interpretation of false positive and negative case using GADCAM++.*

228

### 229 Discussion

230

231 The major contribution of this study is the development and external validation of an CXR-based AI  
232 model for opportunistic CAC screening and identify patients with undiagnosed coronary atherosclerosis.



233 This approach utilizes a multitask fusion learning model to extract calcification features from routine  
234 CXRs and classify CAC scores, with external validation on datasets containing significantly different  
235 population representations (Mayo internal 74% white, EUH 50% African American, and VGTHPE 100%  
236 Asian). Additionally, incorporating clinical factors such as age, sex, and frailty score further enhanced the  
237 model performance in CAC classification. Although the model performance was moderate on the three  
238 CAC group classification (0 vs 1-99 vs 100+) with 0.65 AUROC on Mayo test and average 0.57 AUROC  
239 on VGTHPE and EUH, the model achieved high performance (0.84 average AUROC) for differentiating  
240 high (400+) from 0 CAC score which is the primary task of the opportunistic screening model. Trained  
241 model and the inference code can be downloaded with an academic open-source license from  
242 [https://github.com/jeong-jasonji/MTL\\_CAC\\_classification](https://github.com/jeong-jasonji/MTL_CAC_classification).

243  
244 *Enhancing model performance with clinical information.* Patient age, sex, frailty score, and vendor  
245 information have been identified as significant contributors to the CXR-CAC model's predictive  
246 capabilities. This observation implied the correlations between CAC scores and these patient factors,  
247 which is in line with the recent recommendations on CAC score interpretation (25). The inclusion of  
248 some clinical information alongside the visual features extracted from CXR images enhances the model's  
249 ability to estimate CAC scores accurately and offers a more holistic approach to cardiovascular risk  
250 assessment.

251  
252 *Multitask learning (MTL) paradigm with MACE prediction as auxiliary task.* We addressed the  
253 complexity of the CAC prediction task from CXR by designing a multitask learning paradigm where  
254 MACE prediction is coded as an auxiliary task given the intuition that the CAC score should be highly  
255 correlated with MACE. The proposed model can simultaneously predict CAC category and MACE from  
256 the CXR, and the model achieved high performance for MACE prediction on the internal dataset. Using  
257 an ablation study, the details of which are given in the supplementary materials, we showed that the MTL  
258 model outperformed the single task learning model by a significant margin (0.58 to 0.65 AUROC).  
259 However, given complexity of the MACE outcome curation, we only validated the MACE branch on the  
260 internal dataset.

261  
262 *Existing literature and comparative analysis.* Recently, imaging modalities other than CT have been  
263 considered as potential alternatives for the assessment of CAC scores and its prognostic value with the  
264 assistance of AI models (9). Kamel et. al. (26) created a deep learning model to predict binary CAC  
265 classification (high versus low) from CXR images and reported 0.74 AUC (100+ CAC vs. 0 CAC) on  
266 frontal CXR and 0.7 (400+ CAC vs. 0 CAC) on lateral CXR images, however only validated on a single  
267 institutional data, so its generalizability and clinical impact remains unclear (27). Interestingly, their  
268 model had worse performance in handling cases with more distinct CAC scores. Our AI-CXR model  
269 exhibited high discriminatory abilities (0.83-0.86 AUROC) in predicting zero CAC and 400+ CAC  
270 groups and the findings were confirmed on external datasets.

271  
272 Yuan et al. (9) reported a video-based artificial intelligence (AI) convolutional neural network which was  
273 trained to predict zero versus high (400+) CAC scores from parasternal echocardiography. While  
274 demonstrating good performance (0 CAC: 0.81 and 400+ CAC: 0.74), the study used a relatively clear  
275 cutoff and did not address patients with intermediate-risk (CAC score between 0 to 400), which is a group  
276 with more challenges in preventive intervention decisions. Our model had similar performance in  
277 differentiating cases of CAC 0 and CAC 100+ (Figure 4); we believe the superior performance relates to  
278 the fundamental difference of the 2 modalities, in which x-ray covers the whole heart while TTE only  
279 provides slices through specific cardiac axes; additional x-rays are superior for the detection of  
280 calcification compared to ultrasound. Furthermore, while TTE is a radiation-free modality, its cost-  
281 effectiveness, turnaround time, and availability may not be as favorable as CXR in resource-limited  
282 practice scenarios. Finally, risk stratification based on TTE-predicted CAC showed similar prognostic  
283 value to CT CAC scores in predicting significant differences in 1-year survival rates among high-CAC

284 patients. The Yuan et al. (9) study suggests that deep learning of TTEs holds promise for adjunctive  
285 coronary artery disease risk stratification and guiding preventive therapies.

286  
287 *An AI-enabled opportunistic screening tool - broad impact.* The CXR-CAC model has dual advantages  
288 that make it highly beneficial in the field of cardiovascular risk assessment. Firstly, CXR imaging is  
289 widely available and accessible across various healthcare settings, including primary care clinics, urgent  
290 care centers, hospitals, and even remote or resource-constrained areas (13,28). This widespread  
291 availability enables the model to facilitate opportunistic screenings, allowing for the identification of  
292 individuals at risk for cardiovascular disease without the need for specialized cardiac evaluations. This  
293 inclusive approach ensures that even patients who may not have access to cardiology specialists or  
294 awareness of cardiovascular screening can benefit from risk assessment using CXR imaging, particularly  
295 asymptomatic and young patients. *Without any additional cost, we can also reuse the retrospective CXR*  
296 *images to stratify the wider population based on CAD risk.*

297  
298 Secondly, the CXR-CAC model offers the advantage of low radiation dose, making it suitable for  
299 repetitive screenings. In comparison to CT scans used for coronary artery calcification (CAC) assessment,  
300 CXR-based screening involves significantly reduced radiation exposure. The low radiation dose  
301 associated with CXR allows for repeated screenings over time, facilitating longitudinal tracking of cardiac  
302 health and the timely detection of potential risk factors. Healthcare providers can implement more  
303 frequent screenings using CXR as part of preventive care strategies, enabling closer monitoring of  
304 changes in cardiac health status and supporting early interventions and preventive measures.

305  
306 The combination of CXR's wide availability and low radiation dose, coupled with the power of AI in the  
307 CXR-CAC model, provides a simple, cost-effective, and efficient screening tool. By leveraging existing  
308 infrastructure and the widespread availability of CXR imaging, the CXR-CAC model enables targeted  
309 interventions, public health initiatives, and timely risk stratification for individuals at risk of  
310 cardiovascular disease in underserved areas. This has the potential to improve patient outcomes and  
311 contribute to the early detection and prevention of cardiovascular conditions on a population scale. In  
312 areas where resources, infrastructure, or expertise for cardiac CT are scarce, this approach has the  
313 potential to broaden the availability of CVD screening and risk stratification, thereby enabling timely  
314 interventions and preventive measures for individuals in underserved areas.

315  
316 **Limitations.** The study only considers the frontal view of the CXR image due to wider availability. In  
317 future, lateral view can also be assessed as it may provide additional data to boost the model. The model  
318 only obtained moderate performance for the three class CAC detection task; however, given the  
319 opportunistic screening goal of the framework, the binary risk stratification model obtained an impressive  
320 0.84 average AUROC score on the internal and external validation cohort and should be capable in  
321 differential screening. Given training with the MTL paradigm with MACE, the model derived  
322 misclassification cases for pleuropulmonary conditions and aortic calcification. There was some bias of  
323 false negative rates across different subgroups (gender, race, and age) that we included in the  
324 supplementary materials that will need to be address in future studies. Additionally, we did not have BMI  
325 information at the time of the study to include in our bias analysis as a higher BMI is associated with  
326 higher risk of CAC (29). There was also some sampling bias in our dataset where we generally had a  
327 higher number of patients with pulmonary nodules with low CAC score. Further research and validation  
328 are warranted to optimize the model's performance and evaluate its real-world clinical utility.

329  
330

331 **References**

- 332 1. Bauersachs R, Zeymer U, Brière JB, Marre C, Bowrin K, Huelsebeck M. Burden of coronary artery  
333 disease and peripheral artery disease: a literature review. *Cardiovasc Ther.* 2019;2019.
- 334 2. Leong DP, Joseph PG, McKee M, Anand SS, Teo KK, Schwalm JD, et al. Reducing the global  
335 burden of cardiovascular disease, part 2: prevention and treatment of cardiovascular disease. *Circ*  
336 *Res.* 2017;121(6):695–710.
- 337 3. Kavousi M, Elias-Smale S, Rutten JH, Leening MJ, Vliegenthart R, Verwoert GC, et al. Evaluation  
338 of newer risk markers for coronary heart disease risk classification: a cohort study. *Ann Intern Med.*  
339 2012;156(6):438–44.
- 340 4. Osei AD, Mirbolouk M, Berman D, Budoff MJ, Miedema MD, Rozanski A, et al. Prognostic value of  
341 coronary artery calcium score, area, and density among individuals on statin therapy vs. non-users:  
342 the coronary artery calcium consortium. *Atherosclerosis.* 2021;316:79–83.
- 343 5. Budoff MJ, Nasir K, Kinney GL, Hokanson JE, Barr RG, Steiner R, et al. Coronary artery and  
344 thoracic calcium on noncontrast thoracic CT scans: comparison of ungated and gated examinations in  
345 patients from the COPD Gene cohort. *J Cardiovasc Comput Tomogr.* 2011;5(2):113–8.
- 346 6. Hecht HS, Cronin P, Blaha MJ, Budoff MJ, Kazerooni EA, Narula J, et al. 2016 SCCT/STR  
347 guidelines for coronary artery calcium scoring of noncontrast noncardiac chest CT scans: a report of  
348 the Society of Cardiovascular Computed Tomography and Society of Thoracic Radiology. *J*  
349 *Cardiovasc Comput Tomogr.* 2017;11(1):74–84.
- 350 7. Greenland P, Maron DJ, Budoff MJ. Insurance Payers Should Cover Selective Coronary Artery  
351 Calcium Testing in Intermediate Risk Primary Prevention Patients. *Circulation.* 2022;146(8):585–6.
- 352 8. Venkataraman P, Kawakami H, Huynh Q, Mitchell G, Nicholls SJ, Stanton T, et al. Cost-  
353 effectiveness of coronary artery calcium scoring in people with a family history of coronary disease.  
354 *Cardiovasc Imaging.* 2021;14(6):1206–17.
- 355 9. Yuan N, Kwan AC, Duffy G, Theurer J, Chen JH, Nieman K, et al. Prediction of coronary artery  
356 calcium using deep learning of echocardiograms. *J Am Soc Echocardiogr.* 2023;36(5):474–81.
- 357 10. Lahham A, Issa A, AlMasri H. Patient radiation dose from chest X-ray examinations in the west  
358 bank—Palestine. *Radiat Prot Dosimetry.* 2018;178(3):298–303.
- 359 11. Gargani L, Picano E. The risk of cumulative radiation exposure in chest imaging and the advantage  
360 of bedside ultrasound. *Crit Ultrasound J.* 2015;7:1–4.
- 361 12. Kim KP, Einstein AJ, De González AB. Coronary artery calcification screening: estimated radiation  
362 dose and cancer risk. *Arch Intern Med.* 2009;169(13):1188–94.
- 363 13. Speets AM, van der Graaf Y, Hoes AW, Kalmijn S, Sachs AP, Rutten MJ, et al. Chest radiography in  
364 general practice: indications, diagnostic yield and consequences for patient management. *Br J Gen*  
365 *Pract.* 2006;56(529):574–8.
- 366 14. Agatston AS, Janowitz WR, Hildner FJ, Zusmer NR, Viamonte Jr M, Detrano R. Quantification of  
367 coronary artery calcium using ultrafast computed tomography. *J Am Coll Cardiol.* 1990;15(4):827–  
368 32.
- 369 15. Greenland P, Blaha MJ, Budoff MJ, Erbel R, Watson KE. Coronary calcium score and cardiovascular  
370 risk. *J Am Coll Cardiol.* 2018;72(4):434–47.
- 371 16. Hecht HS, Blaha MJ, Kazerooni EA, Cury RC, Budoff M, Leipsic J, et al. CAC-DRS: coronary  
372 artery calcium data and reporting system. An expert consensus document of the society of  
373 cardiovascular computed tomography (SCCT). *J Cardiovasc Comput Tomogr.* 2018;12(3):185–91.
- 374 17. Kathiravelu P, Sharma P, Sharma A, Banerjee I, Trivedi H, Purkayastha S, et al. A DICOM  
375 framework for machine learning and processing pipelines against real-time radiology images. *J Digit*  
376 *Imaging.* 2021;34(4):1005–13.
- 377 18. Pandey N. Lung segmentation from chest X-ray dataset. Kaggle. [cited 2023 Aug 1]; Available from:  
378 [https://www.kaggle.com/code/nikhilpandey360/lung-segmentation-from-chest-x-ray-](https://www.kaggle.com/code/nikhilpandey360/lung-segmentation-from-chest-x-ray-dataset/notebook)  
379 [dataset/notebook](https://www.kaggle.com/code/nikhilpandey360/lung-segmentation-from-chest-x-ray-dataset/notebook)

- 380 19. Gusarev M, Kuleev R, Khan A, Rivera AR, Khattak AM. Deep learning models for bone suppression  
381 in chest radiographs. In IEEE; 2017. p. 1–7.
- 382 20. Bosco E, Hsueh L, McConeghy KW, Gravenstein S, Saade E. Major adverse cardiovascular event  
383 definitions used in observational analysis of administrative databases: a systematic review. *BMC*  
384 *Med Res Methodol.* 2021;21(1):1–18.
- 385 21. Xie S, Girshick R, Dollár P, Tu Z, He K. Aggregated residual transformations for deep neural  
386 networks. In 2017. p. 1492–500.
- 387 22. Crawshaw M. Multi-task learning with deep neural networks: A survey. *ArXiv Prepr*  
388 *ArXiv200909796.* 2020;
- 389 23. Huang SC, Pareek A, Seyyedi S, Banerjee I, Lungren MP. Fusion of medical imaging and electronic  
390 health records using deep learning: a systematic review and implementation guidelines. *NPJ Digit*  
391 *Med.* 2020;3(1):136.
- 392 24. Chattopadhyay A, Sarkar A, Howlader P, Balasubramanian VN. Grad-cam++: Generalized gradient-  
393 based visual explanations for deep convolutional networks. In IEEE; 2018. p. 839–47.
- 394 25. Obisesan OH, Osei AD, Uddin SI, Dzaye O, Blaha MJ. An update on coronary artery calcium  
395 interpretation at chest and cardiac CT. *Radiol Cardiothorac Imaging.* 2021;3(1):e200484.
- 396 26. Kamel PI, Yi PH, Sair HI, Lin CT. Prediction of coronary artery calcium and cardiovascular risk on  
397 chest radiographs using deep learning. *Radiol Cardiothorac Imaging.* 2021;3(3):e200486.
- 398 27. Gupta S, Blankstein R. Detecting Coronary Artery Calcium on Chest Radiographs: Can We Teach an  
399 Old Dog New Tricks? *Radiol Cardiothorac Imaging.* 2021;3(3):e210123.
- 400 28. Gershengorn HB, Wunsch H, Scales DC, Rubenfeld GD. Trends in use of daily chest radiographs  
401 among US adults receiving mechanical ventilation. *JAMA Netw Open.* 2018;1(4):e181119–e181119.
- 402 29. Jensen JC, Dardari ZA, Blaha MJ, White S, Shaw LJ, Rumberger J, et al. Association of body mass  
403 index with coronary artery calcium and subsequent cardiovascular mortality: the coronary artery  
404 calcium consortium. *Circ Cardiovasc Imaging.* 2020;13(7):e009495.
- 405
